# Supplementary material for: Acoustic impedance-based size-independent isolation of circulating tumour cells from blood using acoustophoresis
Source: Royal Society of Chemistry journal article supplement (doi:10.1039/c8lc00921j), 2018-01-01

## Acoustic impedance based size-independent isolation of circulating tumour cells from blood using acoustophoresis

S. Karthick, P. N. Pradeep, P. Kanchana and A. K. Sen\*

Department of Mechanical Engineering, Indian Institute of Technology Madras, Chennai-600036, India

\*Author to whom correspondence should be addressed. Email: ashis@iitm.ac.in

**Supplementary Figure 1:** Photograph of the acousto microfluidic chip employed for CTCs isolation from PBMCs

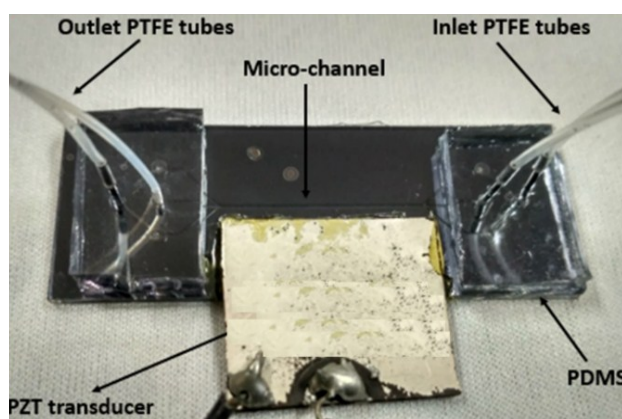

**Supplementary Figure 2:** Photograph of the experimental set-up

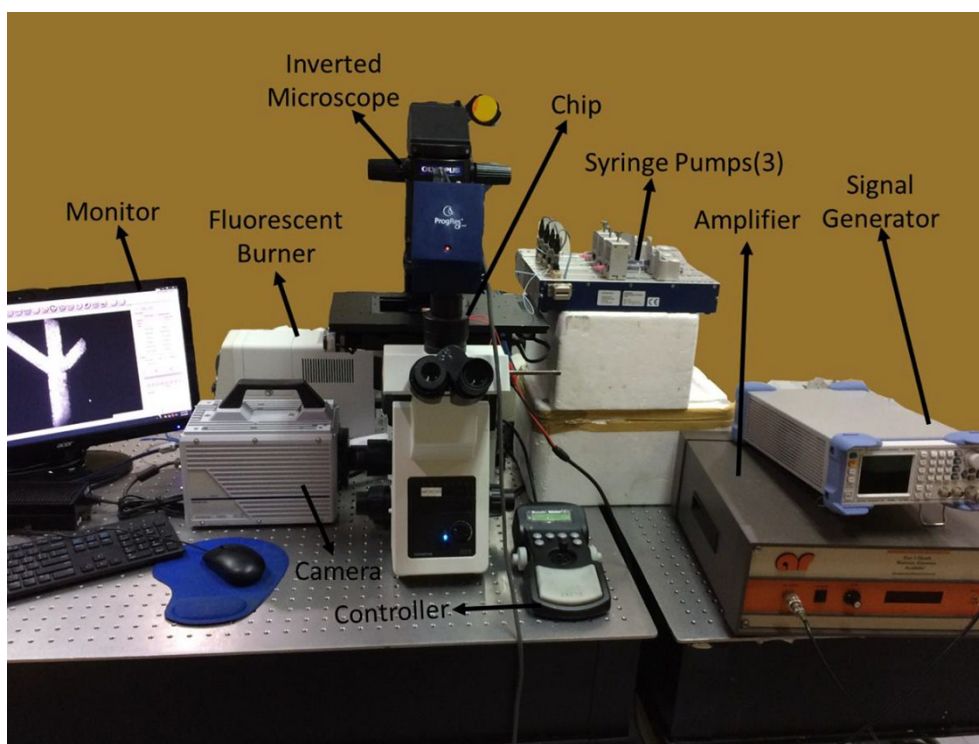

Supplement: c8lc00921j1.pdf [file c8lc00921j1.pdf]
